# Supplementary material for: Comprehensive Two-Dimensional Gas Chromatography with a TOF MS Detector—An Effective Tool to Trace the Signature of Grape Varieties
Source: MDPI journal article supplement (doi:10.3390/molecules29091989), 2024-04-26
Supplement: s1 [file s1]

# Comprehensive two-dimensional gas chromatography with a TOF MS detector – An effective tool to trace the signature of grape varieties

Daniela Fonseca <sup>1</sup>, Nuno Martins <sup>2</sup>, Raquel Garcia <sup>2,3</sup> and Maria João Cabrita <sup>2,3,\*</sup>

<sup>1</sup> Mediterranean Institute for Agriculture, Environment and Development & Institute of Research and Advanced Training, University of Évora, Pólo da Mitra, Ap. 94, 7006-554 Évora, Portugal; daniela.fonseca@uevora.pt

<sup>2</sup> Mediterranean Institute for Agriculture, Environment and Development & Global Change and Sustainability Institute, University of Évora, Pólo da Mitra, Ap. 94, 7006-554 Évora, Portugal; nmartins@uevora.pt

<sup>3</sup> Department of Crop Science, School of Science and Technology, University of Évora, Pólo da Mitra, Ap. 94, 7006-554 Évora, Portugal; raquelg@uevora.pt; mjbc@uevora.pt

\* Correspondence: mjbc@uevora.pt; Tel.: +351-266-760-869

## Supplementary Files

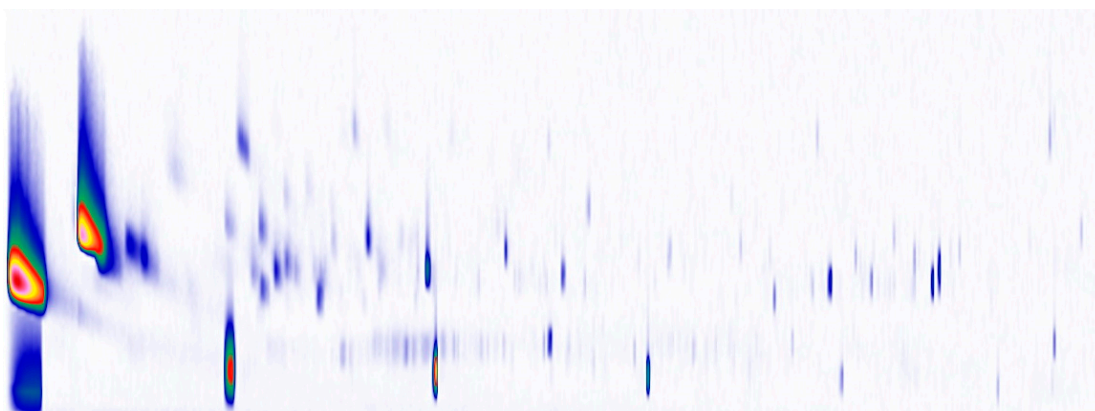

**Figure S1.** Example of a contour plot obtained through GC×GC-TOFMS analysis of a sample of grapes of Trincadeira.

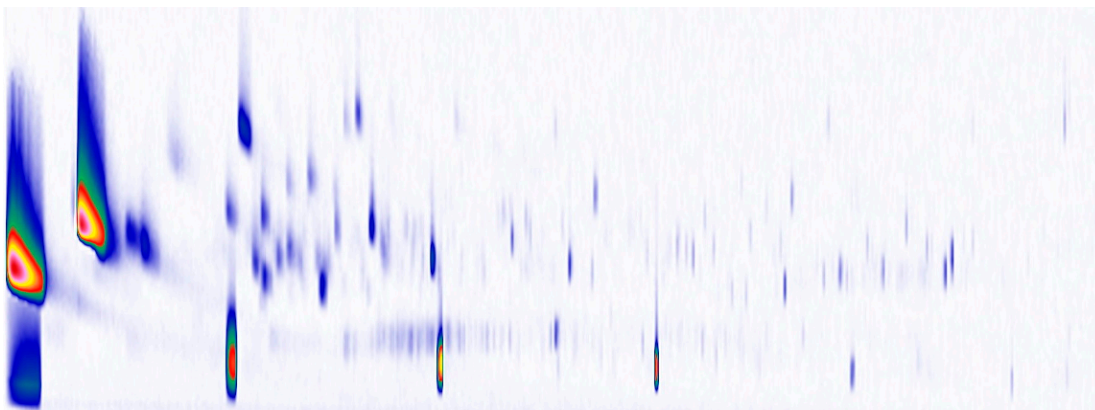

**Figure S2.** Example of a contour plot obtained through GC×GC-TOFMS analysis of a sample of grapes of Cabernet Sauvignon.

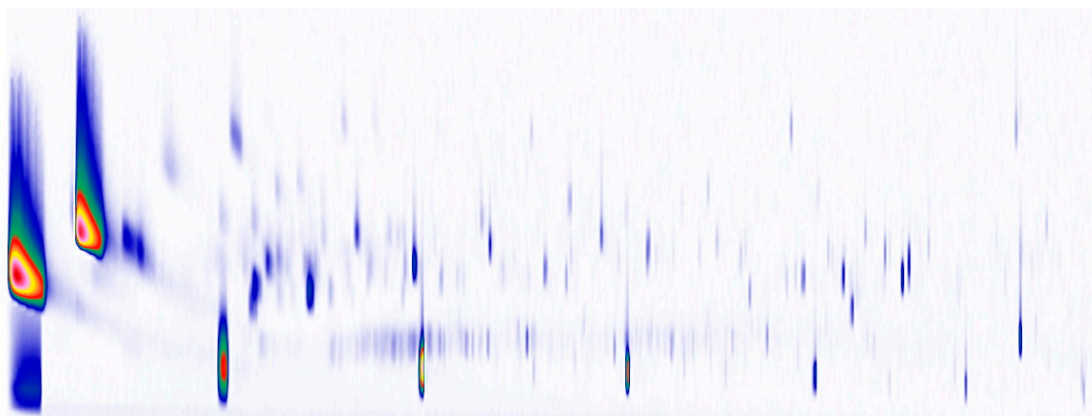

**Figure S3.** Example of a contour plot obtained through GC×GC-TOFMS analysis of a sample of grapes of Tinta Barroca.

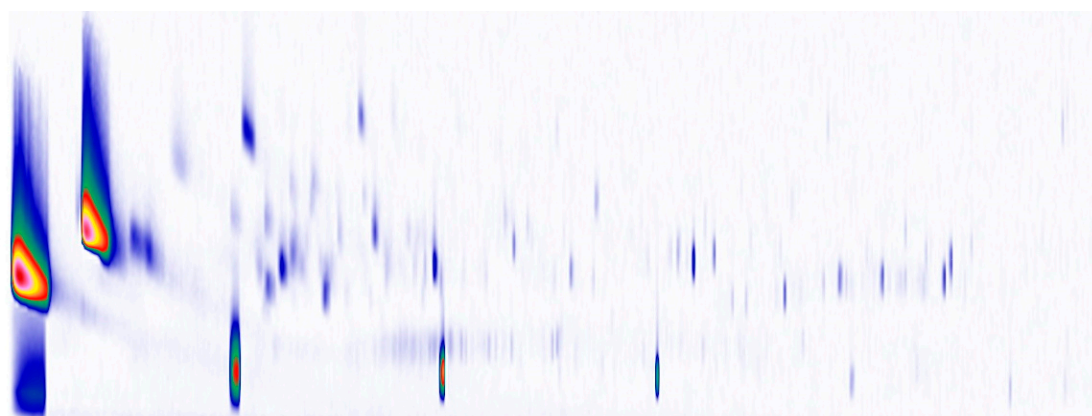

**Figure S4.** Example of a contour plot obtained through GC×GC-TOFMS analysis of a sample of grapes of Syrah.

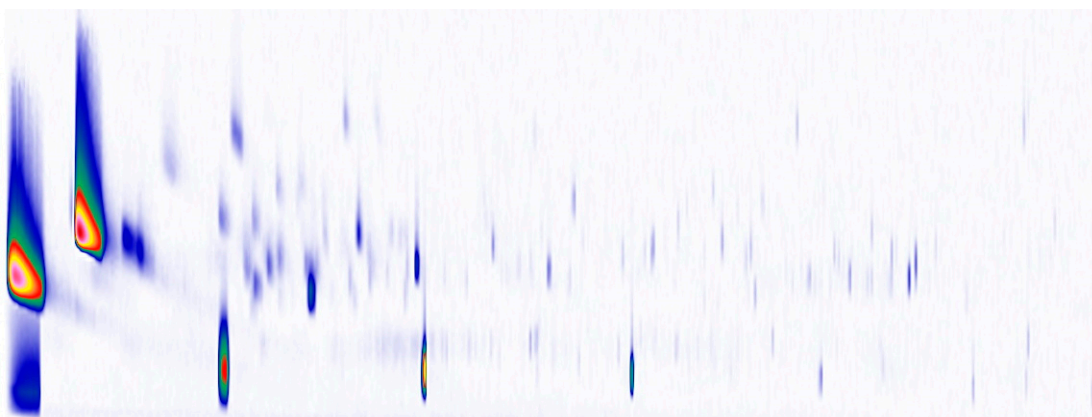

**Figure S5.** Example of a contour plot obtained through GC×GC-TOFMS analysis of a sample of grapes of Castelão.

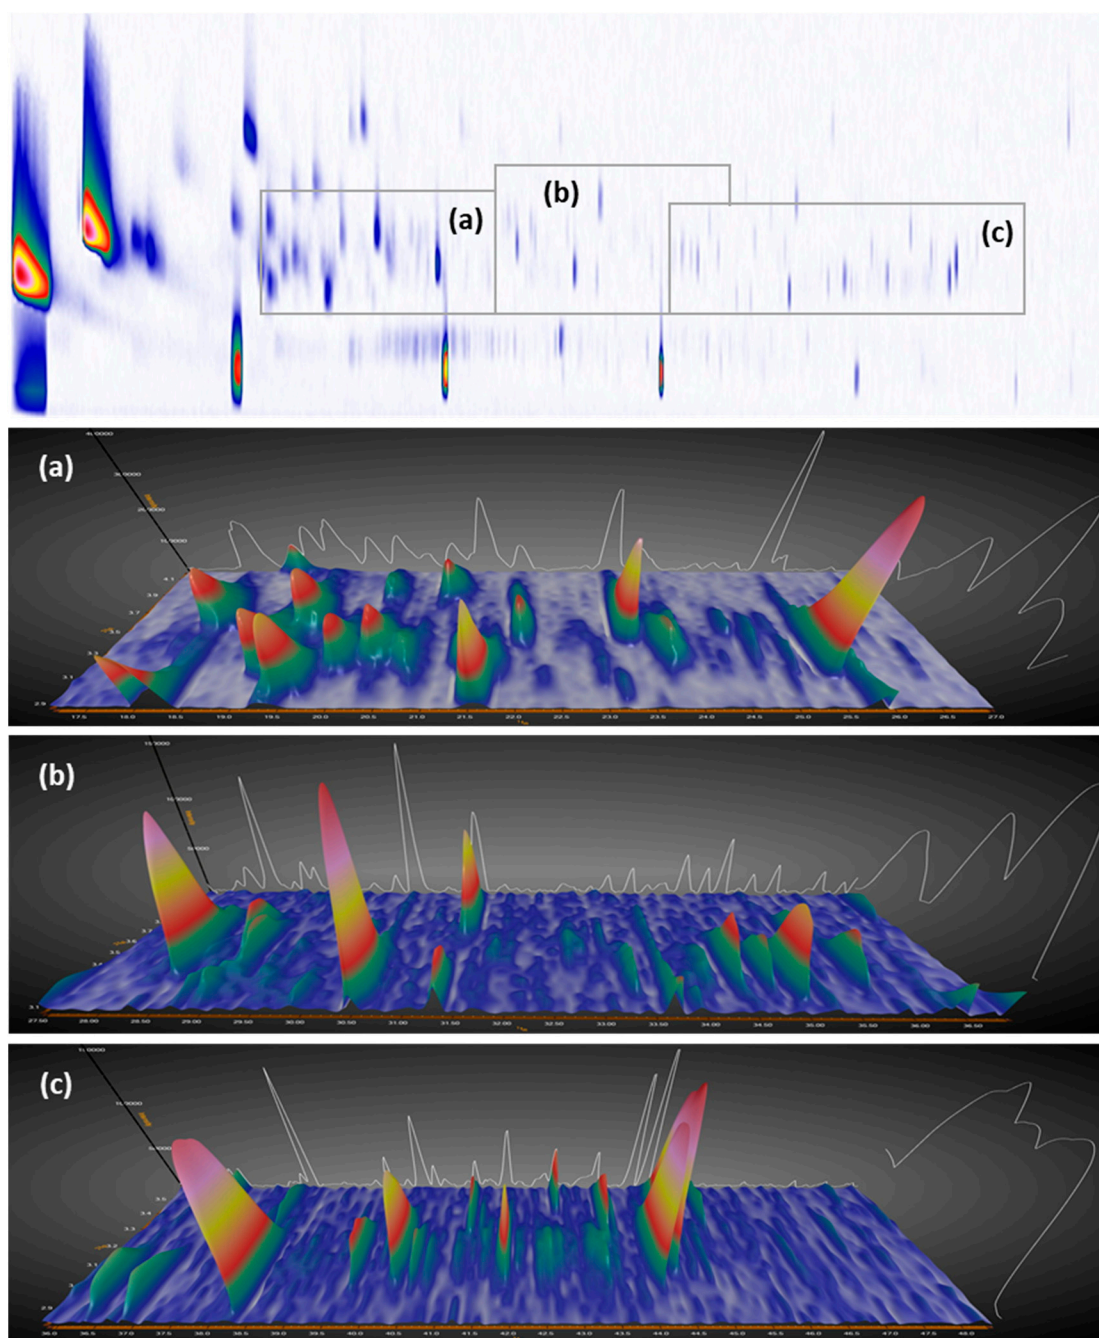

**Figure S6.** Example of a contour plot obtained through GC×GC-TOFMS analysis of a sample of grapes of CS, region of (a) monoterpenes, (b)  $C_{13}$ -norisoprenoids and (c) sesquiterpenes.

**Table S1.** The results of ANOVA and MANOVA for the free varietal compounds.

| Compounds              | ANOVA and MANOVA |         |                       |
|------------------------|------------------|---------|-----------------------|
|                        | Year             | Variety | Year $\times$ Variety |
| $\beta$ -Myrcene       | NS               | NS      | NS                    |
| p-Cymene               | **               | ***     | ***                   |
| d-Limonene             | ***              | **      | *                     |
| Ocimene                | **               | NS      | **                    |
| $\gamma$ -Terpinene    | NS               | NS      | NS                    |
| Dihydromyrcenol        | NS               | NS      | NS                    |
| $\alpha$ -Terpinolene  | NS               | NS      | NS                    |
| p-Cymenene             | NS               | NS      | *                     |
| Tetrahydrolinalool     | **               | *       | NS                    |
| Linalool               | **               | ***     | ***                   |
| Hotrienol              | NS               | NS      | NS                    |
| $\gamma$ -Terpineol    | NS               | NS      | NS                    |
| Menthol                | **               | *       | NS                    |
| $\alpha$ -Terpineol    | *                | NS      | *                     |
| $\beta$ -Citronellol   | NS               | NS      | NS                    |
| Nerol <sup>e</sup>     | NS               | NS      | NS                    |
| cis-Myrtanol           | NS               | *       | NS                    |
| $\delta$ -Elemene      | **               | NS      | NS                    |
| $\alpha$ -Cubebene     | **               | ***     | NS                    |
| $\alpha$ -Ylangene     | *                | NS      | NS                    |
| $\alpha$ -Copaene      | ***              | ***     | NS                    |
| $\beta$ -Elemene       | NS               | NS      | NS                    |
| Isocaryophyllene       | NS               | NS      | NS                    |
| $\alpha$ -Gurjunene    | **               | ***     | NS                    |
| Longifolene            | NS               | NS      | NS                    |
| $\alpha$ -Cedrene      | *                | NS      | NS                    |
| $\beta$ -Caryophyllene | NS               | ***     | NS                    |
| $\gamma$ -Elemene      | ***              | ***     | *                     |
| Aromadendrene          | NS               | NS      | NS                    |
| Aristolene             | ***              | NS      | NS                    |
| $\beta$ -Coapene       | ***              | ***     | ***                   |
| $\alpha$ -Humulene     | *                | **      | NS                    |
| $\beta$ -Guaiene       | *                | NS      | NS                    |
| $\gamma$ -Selinene     | NS               | NS      | NS                    |
| Valencene              | NS               | NS      | NS                    |
| $\gamma$ -Muurolene    | ***              | ***     | **                    |
| $\alpha$ -Amorphene    | NS               | NS      | NS                    |
| $\delta$ -Selinene     | NS               | NS      | NS                    |
| Zonarene               | ***              | ***     | ***                   |
| $\alpha$ -Cadinene     | ***              | ***     | *                     |

| Table S1. Cont.            |                  |           |                  |
|----------------------------|------------------|-----------|------------------|
| Compounds                  | ANOVA and MANOVA |           |                  |
|                            | Year             | Varieties | Year × Varieties |
| <b>β-Cadinene</b>          | ***              | ***       | ***              |
| <b>cis-Calamenene</b>      | ***              | ***       | ***              |
| <b>m/z 105/161/189/204</b> | **               | NS        | NS               |
| <b>α-Calacorene</b>        | ***              | ***       | *                |
| <b>Cadalene</b>            | NS               | ***       | NS               |
| <b>β-Cyclocitral</b>       | NS               | ***       | ***              |
| <b>Vitispirane</b>         | NS               | NS        | NS               |
| <b>Theaspirane A</b>       | **               | ***       | **               |
| <b>Theaspirane B</b>       | **               | **        | **               |
| <b>β-Damascenone</b>       | NS               | ***       | NS               |
| <b>Geranylacetone</b>      | NS               | ***       | ***              |
| <b>β-Ionone</b>            | NS               | **        | *                |

Year×Variety: Interaction between year and varieties. Statistically significant at \* $p \leq 0.05$ , \*\* $p \leq 0.01$  and \*\*\* $p \leq 0.001$ , respectively. NS: Not significant.
